# Supplementary material for: Patterns of satellite tagged hen harrier disappearances suggest widespread illegal killing on British grouse moors
Source: PubMed Central journal article supplement (PMC6424969; doi:10.1038/s41467-019-09044-w), 2019-03-19
Supplement: 41467_2019_9044_MOESM1_ESM.pdf [file 41467_2019_9044_MOESM1_ESM.pdf]

Supplementary Information

**Patterns of satellite tagged hen harrier disappearances suggest widespread illegal killing on British grouse moors**

Murgatroyd et al.

Supplementary Table 1: Summary of all hen harrier tracking data used in analyses.

| Bird identity | Fate | <i>n</i> fixes | <i>n</i> days | <i>n</i> terminal fixes |
|---------------|------|----------------|---------------|-------------------------|
| 161143        | A    | 326            | 94            | na                      |
| 162150        | A    | 383            | 90            | na                      |
| 162149Mo      | A    | 394            | 97            | na                      |
| 162148        | A    | 1499           | 448           | na                      |
| 161962        | A    | 1703           | 450           | na                      |
| 117314        | A    | 2955           | 1535          | na                      |
| 117313        | A    | 3008           | 1552          | na                      |
| 137372Na      | N    | 13             | 13            | 11                      |
| 137372Jo      | N    | 84             | 34            | 33                      |
| 74926*        | N    | 117            | 32            | 42                      |
| 94588         | N    | 342            | 241           | 5                       |
| 94592         | N    | 402            | 175           | 6                       |
| 58946*        | I    | 88             | 30            | 14                      |
| 162149Ro      | I    | 373            | 98            | 19                      |
| 58946An*      | I    | 601            | 270           | 15                      |
| 74843         | I    | 845            | 355           | 26                      |
| 94590         | SIM  | 8              | 3             | 8                       |
| 73589         | SIM  | 17             | 90            | 3                       |
| 73582         | SIM  | 19             | 108           | 6                       |
| 73588         | SIM  | 28             | 93            | 6                       |
| 73586         | SIM  | 47             | 91            | 4                       |
| 90690         | SIM  | 54             | 34            | 14                      |
| 147107        | SIM  | 70             | 24            | 25                      |
| 73591         | SIM  | 73             | 103           | 13                      |
| 73590         | SIM  | 79             | 110           | 8                       |
| 58870         | SIM  | 85             | 40            | 23                      |
| 94589         | SIM  | 92             | 49            | 19                      |
| 94591         | SIM  | 121            | 56            | 26                      |
| 73584         | SIM  | 136            | 333           | 21                      |
| 90688         | SIM  | 150            | 79            | 22                      |
| 90687         | SIM  | 165            | 126           | 10                      |
| 74843Ja       | SIM  | 174            | 45            | 41                      |
| 137369        | SIM  | 195            | 67            | 28                      |
| 94588Ba       | SIM  | 205            | 57            | 32                      |
| 147109        | SIM  | 239            | 74            | 29                      |
| 73585         | SIM  | 245            | 112           | 2                       |
| 33335         | SIM  | 255            | 397           | 8                       |
| 74931*        | SIM  | 273            | 71            | 39                      |
| 90689         | SIM  | 280            | 103           | 21                      |
| 33325         | SIM  | 289            | 359           | 16                      |
| 90691         | SIM  | 291            | 239           | 14                      |
| 33334         | SIM  | 307            | 750           | 1                       |
| 58867         | SIM  | 309            | 160           | 11                      |

|           |     |      |     |    |
|-----------|-----|------|-----|----|
| 137859    | SIM | 323  | 84  | 46 |
| 58943     | SIM | 339  | 63  | 46 |
| 58945     | SIM | 361  | 149 | 8  |
| 161961    | SIM | 388  | 93  | 37 |
| 137372Jo2 | SIM | 433  | 141 | 22 |
| 74832     | SIM | 438  | 106 | 36 |
| 117316    | SIM | 440  | 88  | 43 |
| 74842     | SIM | 451  | 138 | 8  |
| 58941     | SIM | 471  | 140 | 2  |
| 161147    | SIM | 485  | 155 | 9  |
| 147108    | SIM | 732  | 250 | 28 |
| 33328     | TF  | 6    | 10  | na |
| 58872     | TF  | 915  | 522 | na |
| 73587     | TF  | 84   | 402 | na |
| 117315    | TF  | 1242 | 374 | na |

Fate abbreviations: A: Alive and still transmitting, TF: Transmitter malfunctioned (i.e. the tag ceased transmitting but the bird was confirmed to be alive visually) or tag failure likely due to diagnostic plots, SIM: Suspected Illegal Mortality, I: Bird dead, confirmed to have been illegally killed or tag dropped under suspicious circumstances (i.e. the tag was recovered with no harness damage and the bird had been removed from the harness), N: Bird recovered and cause of death established to be natural. All tags were set to duty cycle 8 hours on and 48 hours off, except \* which had 10 hours on 60 hours off. *n* fixes; total number of fixes (Location class 3, 2, 1, 0), *n* days; total number of days since tagging until last known fix (or cut-off at 5<sup>th</sup> Oct 2017 for alive birds). *n* terminal fixes; total number of fixes in the last week of tracking.

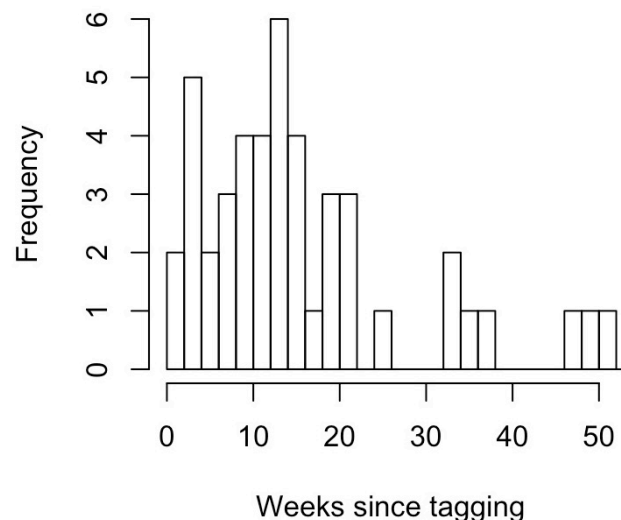

Supplementary Figure 1: The frequency of hen harrier deaths or disappearances during the first year of life.

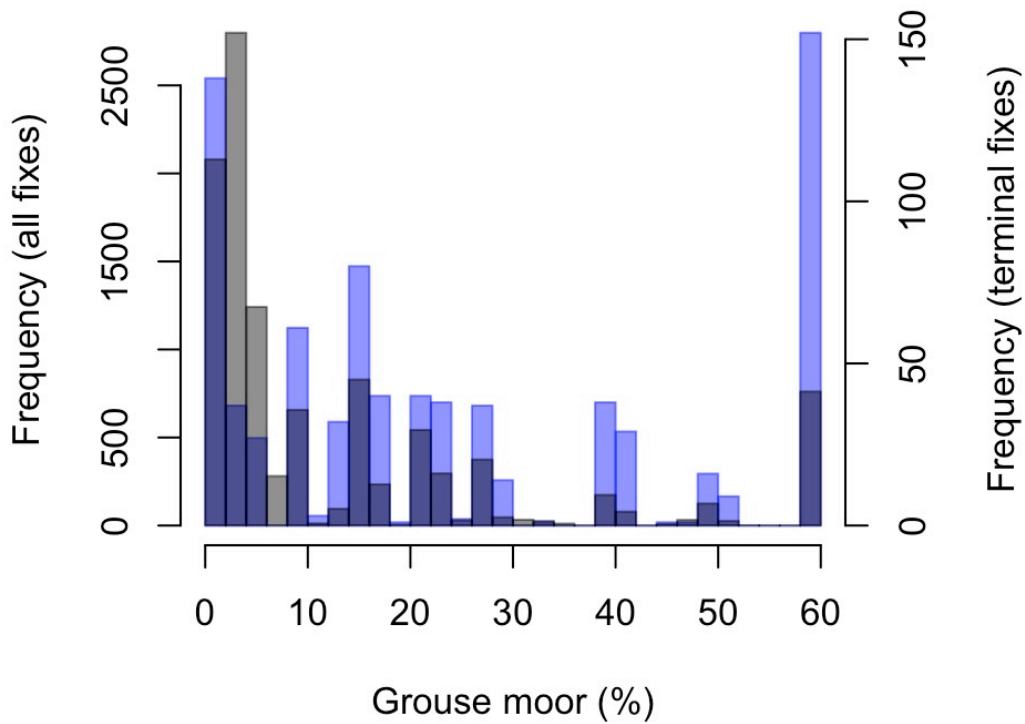

Supplementary Figure 2: The frequency of all (i.e. live and terminal fixes) hen harrier locational fixes on managed grouse moors in the UK (grey bars) and the same frequency for fixes in the terminal week of life only (z-axis, blue bars). These data are from birds that were suspected or known to have been illegally killed.

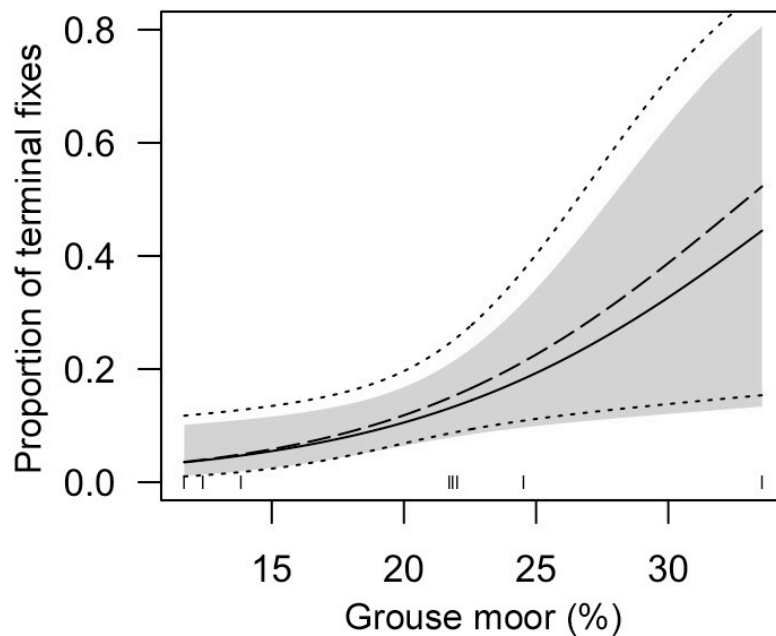

Supplementary Figure 3: Relationship between probability of last week and percentage grouse moor habitat in protected areas in the UK. \*dashed lines are for harriers suspected or known to have been illegally killed, dotted are their CIs. Solid line and grey CIs are for all tracked harriers.

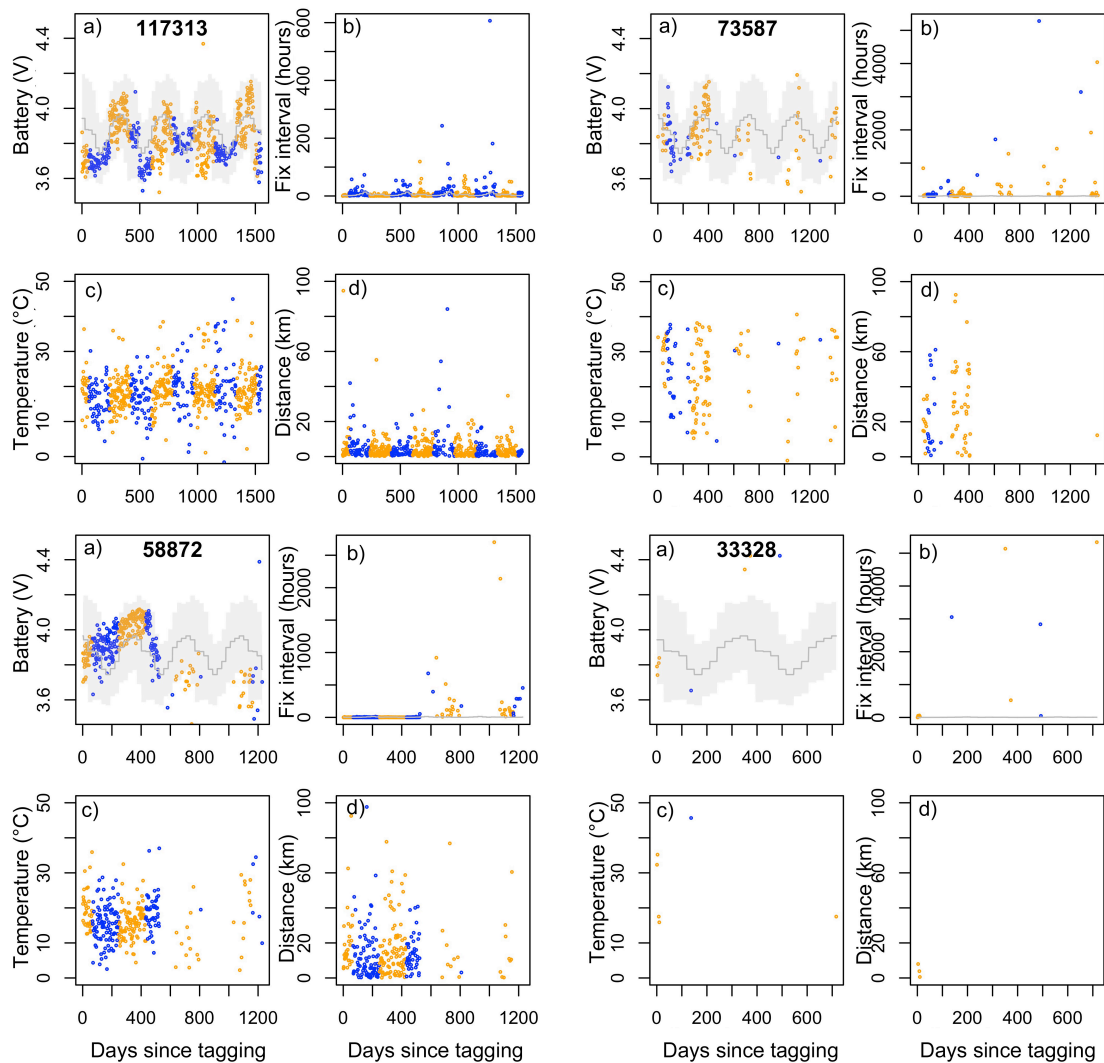

Supplementary Figure 4: Diagnostic plot examples for four tags: (a) Mean daily battery voltage. This indicated a voltage level outside of the ‘normal’ range for that time of year. Voltage follows a sinusoidal pattern through the seasons, thus to understand the ‘normal’ range we also plotted the average ( $\pm$  standard deviation) voltage for all transmitters. These were trimmed by 30 days at the start and end of tracking to remove any potentially inaccurate data; e.g. failing battery at end of tracking period, for each month of the year (regardless of year); (b) Mean daily fix interval. Frequent high ( $>100$  hours) values or long delays not corresponding with low voltage during winter months were indications of tag failure; (c) Mean temperature. Sudden unexpected fluctuation in the temperature sensor can be indicative of a possible imminent tag failure (Whitfield and Fielding 2017); (d) Mean daily distance moved. Highly fluctuating distances moved can be indicative of antenna damage and frequent failure to secure accurate fixes. Point colours broadly separate summer (orange) and winter (blue) months. 117313 is alive and still tracking, this diagnostic plot is typical of a healthy tag with annual cyclic fluctuations in battery and temperature and low fix interval and distance travelled. These patterns are also present on tags which were classified an “stopped no malfunction”; whereby usual diagnostics were followed by sudden cessation of tracking. 75387 tracker failed and this bird was subsequently photographed alive. Fix intervals are sporadic and distance travelled is so large it become outside the y-axis limit indicating poor fix accuracy. 58872 and 33328 are the only trackers classified as failed due solely to diagnostic plots.
